# Supplementary material for: Potential Circumstances Associated With Moral Injury and Moral Distress in Healthcare Workers and Public Safety Personnel Across the Globe During COVID-19: A Scoping Review
Source: Frontiers journal article supplement (doi:10.3389/fpsyt.2022.863232), 2022-06-13
Supplement: Table_3.docx [file Table_3.docx]

**Supplementary Table 3: Moral conflicts associated with PMIDE categories**

| **PMIDE categories** | **Moral conflicts** |
| --- | --- |
| ‘Risk of contracting or transmitting COVID-19’ | Balancing duty to patients and duty to oneself and loved ones |
| ‘Inability to work on the frontlines’ | Unable to fulfill duty to colleagues due to external constraints |
| ‘Provision of suboptimal care’ | Unable to fulfill duty to patients due to external constraints |
| ‘Care prioritization and resource allocation’ | Unable to fulfill duty to patients due to external constraints |
| ‘Perceived lack of support and unfair treatment by their organization’ | HCWs risking their lives for an organization who does not protect them |
| ‘Stigma, discrimination, and abuse’ | HCWs risking their lives for the public who unfairly treats them |
